# Supplementary material for: A single-atom Cu–N2catalyst eliminates oxygen interference for electrochemical sensing of hydrogen peroxide in a living animal brain
Source: Royal Society of Chemistry journal article supplement (doi:10.1039/d1sc04755h), 2021-01-01
Supplement: d1sc04755h1.pdf [file d1sc04755h1.pdf]

## Supporting Information

### Single-Atom Cu-N<sub>2</sub> Catalyst Eliminates Oxygen Interference for Electrochemical Sensing of Hydrogen Peroxide in Living Animals

Xiaolong Gao,<sup>ac‡</sup> Wenjie Ma,<sup>ac‡</sup> Junjie Mao,<sup>d‡</sup> Chunting He,<sup>e</sup> Wenliang Ji,<sup>a</sup> Zheng Chen,<sup>d</sup> Wenxing Chen,<sup>f</sup> Wenjie Wu,<sup>a</sup> Ping Yu,<sup>ac</sup> and Lanqun Mao<sup>\*abc</sup>

<sup>a</sup> Beijing National Laboratory for Molecular Sciences, Key Laboratory of Analytical Chemistry for Living Biosystems, Institute of Chemistry, The Chinese Academy of Sciences (CAS), Beijing 100190, China

<sup>b</sup> College of Chemistry, Beijing Normal University, Xijiekouwai Street 19, Beijing 100875, China

<sup>c</sup> University of Chinese Academy of Sciences, Beijing 100049, China

<sup>d</sup> Key Laboratory of Functional Molecular Solids, Ministry of Education, College of Chemistry and Materials Science, Anhui Normal University, Wuhu 241002, China

<sup>e</sup> MOE Key Laboratory of Functional Small Organic Molecule, College of Chemistry and Chemical Engineering, Jiangxi Normal University, Nanchang 330022, China

<sup>f</sup> Beijing Key Laboratory of Construction Tailorable Advanced Functional Materials and Green Applications, School of Materials Science and Engineering, Beijing Institute of Technology, Beijing 100081, China

<sup>‡</sup> These authors contributed equally to this work.

\* Email: lqmao@bnu.edu.cn

## Table of contents

|                                                                  |           |
|------------------------------------------------------------------|-----------|
| <b>Section 1: Materials and Methods.....</b>                     | <b>3</b>  |
| <b>Materials.....</b>                                            | <b>3</b>  |
| <b>Synthesis of <math>C_3N_4</math>.....</b>                     | <b>3</b>  |
| <b>Synthesis of <math>Cu_1/C_3N_4</math>.....</b>                | <b>3</b>  |
| <b>Preparation of <math>Cu_1/C_3N_4/CNT</math>.....</b>          | <b>4</b>  |
| <b>Characterization.....</b>                                     | <b>4</b>  |
| <b>XAFS measurement.....</b>                                     | <b>4</b>  |
| <b>Electrochemical measurements.....</b>                         | <b>4</b>  |
| <b>In vivo experiments.....</b>                                  | <b>5</b>  |
| <b>Section 2: Supplementary Figures and Tables.....</b>          | <b>6</b>  |
| <b>Section 3: Supplementary Discussions of Calculations.....</b> | <b>32</b> |
| <b>Section 4: References .....</b>                               | <b>36</b> |

## 1. Materials and Methods

**Materials.** Copper (II) nitrate hydrate [ $\text{Cu}(\text{NO}_3)_2 \cdot 3\text{H}_2\text{O}$ ], iron (III) nitrate nonahydrate [ $\text{Fe}(\text{NO}_3)_3 \cdot 9\text{H}_2\text{O}$ ], cobalt (II) nitrate hexahydrate [ $\text{Co}(\text{NO}_3)_2 \cdot 6\text{H}_2\text{O}$ ], manganese (II) acetate [ $\text{Mn}(\text{CH}_3\text{COO})_2$ ] and ethanol were purchased from Sinopharm Chemical Reagent Co. Ltd. (Shanghai, China). LUDOX<sup>®</sup> AS-40 colloidal silica, dopamine (DA), uric acid (UA), 3,4-dihydroxyphenylacetic acid (DOPAC), 5-hydroxytryptamine (5-HT), mercaptosuccinate (MCS), and glutathione monoethyl ester (GSOEt) were purchased from Sigma-Aldrich. Cyanamide, ammonium bifluoride ( $\text{NH}_4\text{HF}_2$ ) were purchased from Alfa Aesar. The water used in all experiments was ultrapure (18.2  $\text{M}\Omega \cdot \text{cm}$ ). Carbon nanotubes (CNTs, single-walled, 5-15  $\mu\text{m}$  in length and 1-2 nm in diameter) was purchased from Shenzhen Nanotech Co., Ltd. (Shenzhen, China). All chemical reagents were used as supplied without further purification. Artificial cerebrospinal fluid (aCSF) used as the electrolyte for *in vitro* and *in vivo* electrochemical measurements was prepared by mixing NaCl (126 mM), KCl (2.4 mM),  $\text{KH}_2\text{PO}_4$  (0.5 mM),  $\text{MgCl}_2$  (0.85 mM),  $\text{NaHCO}_3$  (27.5 mM),  $\text{Na}_2\text{SO}_4$  (0.5 mM), and  $\text{CaCl}_2$  (1.1 mM) into water and then adjusting the pH to 7.4.

**Synthesis of  $\text{C}_3\text{N}_4$ .**  $\text{C}_3\text{N}_4$  was synthesized with a slightly modified method according to the previous literature.<sup>[1]</sup> Briefly, cyanamide (5 g) and LUDOX<sup>®</sup> AS-40 silica dispersion (12.5g) were mixed together until the suspension turned to apparent. The mixture was heated at 100 °C for several hours upon stirring to the formation of a white solid. The white powder was then grounded in a mortar, transferred into a crucible and heated up to 550 °C with the heating rate of 2.3 °C $\cdot\text{min}^{-1}$  and then kept at 550 °C for 4 h under air. The as-obtained yellow powder was grounded in a mortar and then treated with a 4 M  $\text{NH}_4\text{HF}_2$  solution under stirring for 2 days. The precipitate was obtained after filtration, washed with distilled water and ethanol for several times. The resultant yellow solid was dried under vacuum at 120 °C overnight.

**Synthesis of  $\text{Cu}_1/\text{C}_3\text{N}_4$ .** The  $\text{Cu}_1/\text{C}_3\text{N}_4$  was synthesized by adding  $\text{Cu}(\text{NO}_3)_2$  solution (10  $\text{mg} \cdot \text{mL}^{-1}$ ) to the  $\text{C}_3\text{N}_4$  dispersion (4  $\text{mg} \cdot \text{mL}^{-1}$ ). After stirring for about 24 h, the suspension was centrifuged, and the precipitate was washed with water and ethanol for several times and finally dried under vacuum at 70 °C. The as-prepared powder was transferred into a ceramic boat and then placed into a tube furnace. The sample was heated to 400 °C with a heating rate of 3 °C $\cdot\text{min}^{-1}$  and kept at 400 °C for 2 h under 5%  $\text{H}_2/\text{Ar}$  atmosphere.

The  $\text{Fe}_1/\text{C}_3\text{N}_4$ ,  $\text{Co}_1/\text{C}_3\text{N}_4$  and  $\text{Mn}_1/\text{C}_3\text{N}_4$  catalysts were prepared using the similar procedure with the  $\text{Cu}_1/\text{C}_3\text{N}_4$  catalyst except for replacing copper salt with  $\text{Fe}(\text{NO}_3)_3 \cdot 9\text{H}_2\text{O}$ ,  $\text{Co}(\text{NO}_3)_2 \cdot 6\text{H}_2\text{O}$  and  $\text{Mn}(\text{CH}_3\text{COO})_2$ , respectively.

**Preparation of  $\text{Cu}_1/\text{C}_3\text{N}_4/\text{CNT}$ .** 1  $\text{mg} \cdot \text{mL}^{-1}$   $\text{Cu}_1/\text{C}_3\text{N}_4$  and 1  $\text{mg} \cdot \text{mL}^{-1}$  CNT dispersed solutions were first prepared by sonication. And then, the two dispersions were mixed by equal volume to form  $\text{Cu}_1/\text{C}_3\text{N}_4/\text{CNT}$  dispersion for electrode modification.  $\text{C}_3\text{N}_4/\text{CNT}$  dispersion were prepared similarly with  $\text{C}_3\text{N}_4$  replacing  $\text{Cu}_1/\text{C}_3\text{N}_4$ .

**Characterization.** XRD patterns of samples were recorded by a Rigaku RU-200b with Cu  $\text{K}\alpha$  radiation ( $\lambda = 0.15406 \text{ nm}$ ). SEM images were recorded on a Hitachi SU8020 to acquire the morphology of the catalysts. TEM images were performed on a Hitachi-7800 at 100.0 kV. HAADF-STEM tests were carried out by using a Titan 80-300 scanning/transmission electron microscope at 300 kV with a spherical aberration corrector. Nitrogen

adsorption–desorption isotherms were recorded on a Quadrasorb SI-MP system at 77 K. X-ray photoelectron spectra were gained from an ESCALab220i-XL electron spectrometer with an Al K $\alpha$  radiation used. Fourier transform infrared (FT-IR) spectra were recorded on a Shimadzu IR Prestige-21 spectrometer.

**XAFS measurement.** The XAFS spectra at Cu K edge ( $E_0 = 8979$  eV) was tested at beamline 14W1 station of Shanghai Synchrotron Radiation Facility worked at 3.5 GeV with an average current of 260 mA under “top-up” mode. The XAFS data were extracted in a fluorescence mode with Si (111) double-crystal monochromator and Lytle-type ion chamber, using Cu foil, Cu phthalocyanine and CuO as references. Program ATHENA in the IFEFFIT software packages was used for data analysis.

**Electrochemical measurements.** Electrochemical tests were performed on a CHI 760E electrochemical workstation with a three-electrode system in aCSF. A glassy carbon (GC) electrode (3 mm in diameter) modified with the catalyst was served as the working electrode, an Ag/AgCl electrode and a Pt wire were used as reference and counter electrode, respectively. Cyclic voltammetry (CV) experiments were performed in aCSF with a scan rate of 50 mV $\cdot$ s $^{-1}$ . Electrochemical impedance spectra (EIS) were recorded on an Autolab PGSTAT302 from 0.1 MHz to 0.1 Hz with a three-electrode system in aCSF.

Carbon fiber microelectrode (CFE) was fabricated as reported previously.<sup>[2]</sup> A single carbon fiber (7  $\mu$ m diameter, Tokai Carbon Co., Tokai, Japan) was carefully inserted into the capillary, pulled on a vertical pipet puller (WD-1, Sichuan, China). Prior to modification, the fabricated CFE was sequentially sonicated in a solution of acetone, 3 M HNO $_3$ , 1.0 M KOH, and deionized water for 3 min. Then the electrodes were subjected to electrochemical activation, first with potential-controlled amperometry at +2.0 V for 30 s and at -1.0 V for 10 s, and then with cyclic voltammetry in 0.5 M H $_2$ SO $_4$  within a potential range from 0 to 1.0 V at a scan rate of 0.1 V $\cdot$ s $^{-1}$  until a stable cyclic voltammogram was obtained.

**In vivo experiments.** In vivo experiments were performed as reported previously.<sup>[2]</sup> All in vivo experimental procedures were complied with the guidelines of the Animal Advisory Committee at the State Key Laboratory of Cognitive Neuroscience and Learning, and were approved by the Institutional Animal Care and Use Committee at Beijing Normal University. Adult male guinea pigs (250-300 g) used in this study were purchased from Health Science Center, Peking University. Briefly, the Cu $_1$ /C $_3$ N $_4$ /CNT/CFE was inserted into the right cortex (AP = 3 mm, L = 2 mm lateral from bregma, V = 1 mm from surface of skull) according to the stereotaxic procedures. The micro-sized Ag/AgCl reference electrode was positioned into the dura of brain. Platinum wire was used as the counter electrode inserted in subcutaneous tissue on the brain. Exogenous aCSF containing 100  $\mu$ M H $_2$ O $_2$ , MCS or GSOEt was microinfused to the local area of the microelectrode in the brain through silica capillary tube (4 cm length, 50  $\mu$ m i.d., 375  $\mu$ m o.d.) which was implanted into the right cortex parallel with Cu $_1$ /C $_3$ N $_4$ /CNT/CFE, also denoted as SAC-based microsensor. These solutions were delivered from gas-impermeable syringes and pumped through tetrafluoroethylenehexafluoropropene (FEP) tubing by a microinjection pump (CMA100, CMA Microdialysis AB, Stockholm, Sweden). All local microinfusions were performed in the striatum of the rat brain at

the rate of  $1.0 \mu\text{L} \cdot \text{min}^{-1}$ .

## 2. Supplementary Figures and Tables

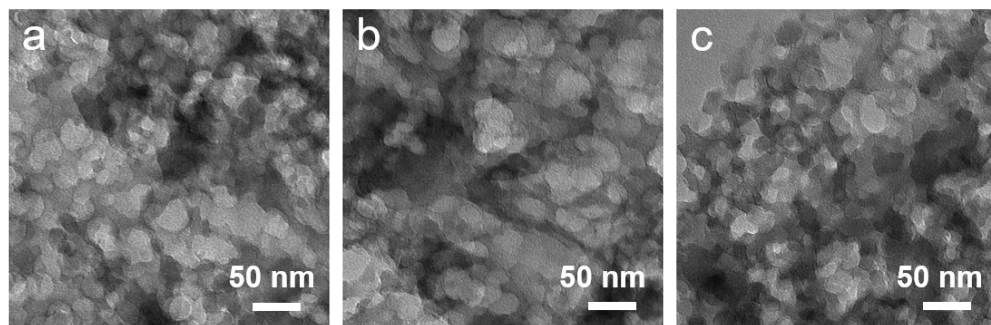

**Fig. S1** TEM images of  $\text{Fe}_1/\text{C}_3\text{N}_4$  (a),  $\text{Co}_1/\text{C}_3\text{N}_4$  (b),  $\text{Mn}_1/\text{C}_3\text{N}_4$  (c).

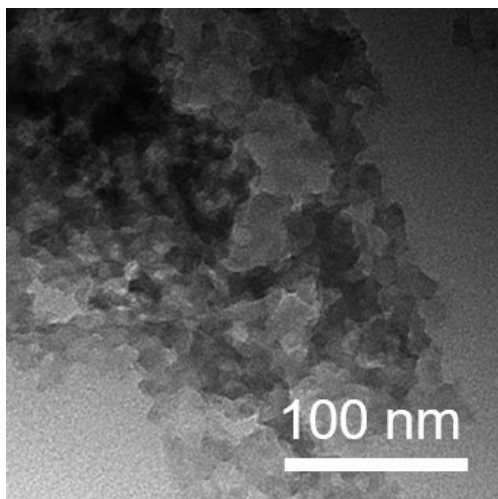

**Fig. S2** TEM image of C<sub>3</sub>N<sub>4</sub>.

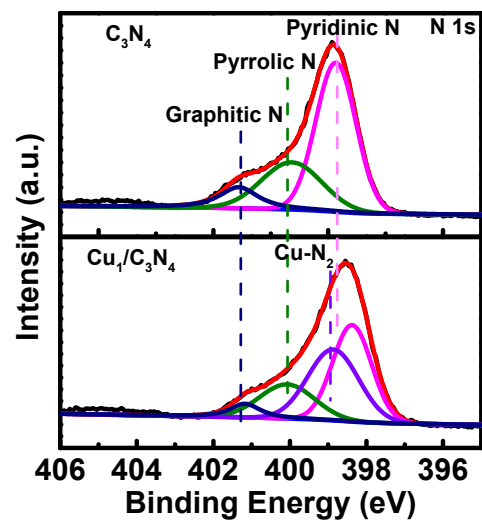

**Fig. S3** High resolution N 1s XPS spectra of  $C_3N_4$  and  $Cu_1/C_3N_4$ .

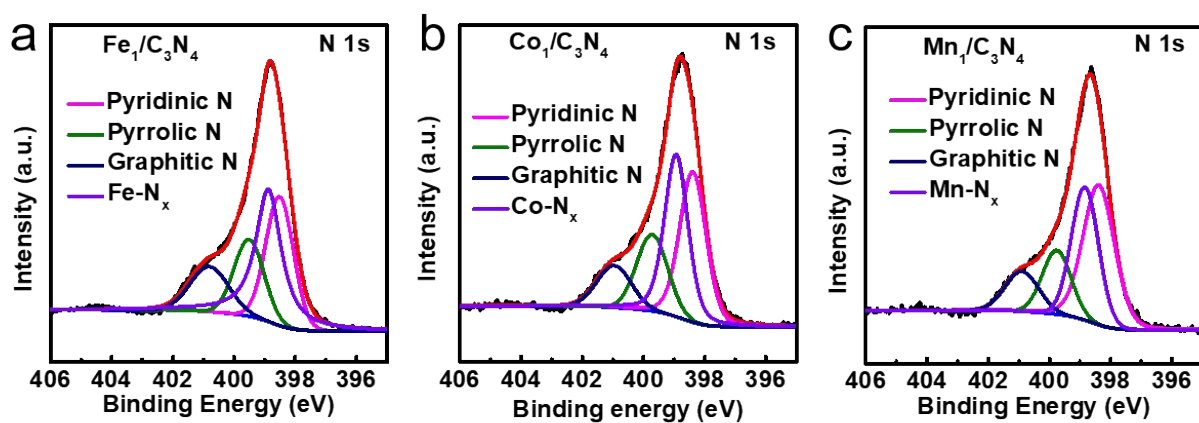

**Fig. S4** High resolution N 1s XPS spectra of Fe<sub>1</sub>/C<sub>3</sub>N<sub>4</sub> (a), Co<sub>1</sub>/C<sub>3</sub>N<sub>4</sub> (b) and Mn<sub>1</sub>/C<sub>3</sub>N<sub>4</sub> (c).

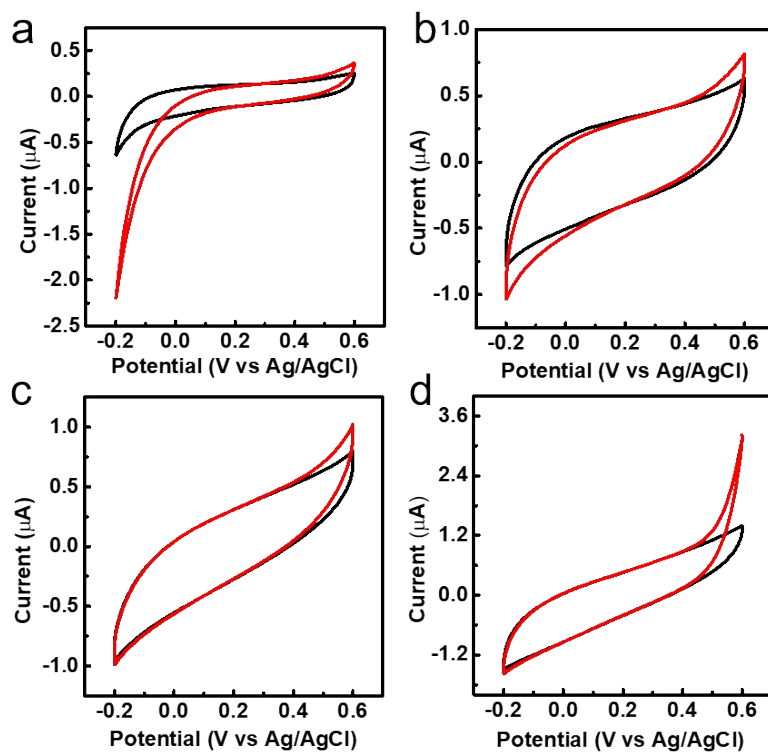

**Fig. S5** CVs of Cu<sub>1</sub>/C<sub>3</sub>N<sub>4</sub>/GC (a), Fe<sub>1</sub>/C<sub>3</sub>N<sub>4</sub>/GC (b), Co<sub>1</sub>/C<sub>3</sub>N<sub>4</sub>/GC (c) and Mn<sub>1</sub>/C<sub>3</sub>N<sub>4</sub>/GC (d) in aCSF without (black line) and with (red line) 5 mM H<sub>2</sub>O<sub>2</sub>. Scan rates: 50 mV/s.

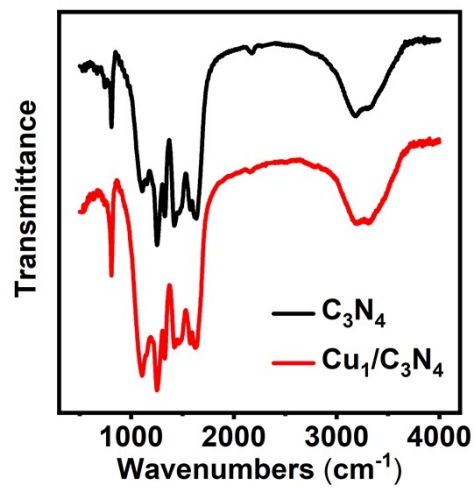

**Fig. S6** Fourier transform infrared (FT-IR) spectra of the as-synthesized C<sub>3</sub>N<sub>4</sub> (black line) and Cu<sub>1</sub>/C<sub>3</sub>N<sub>4</sub> (red line).

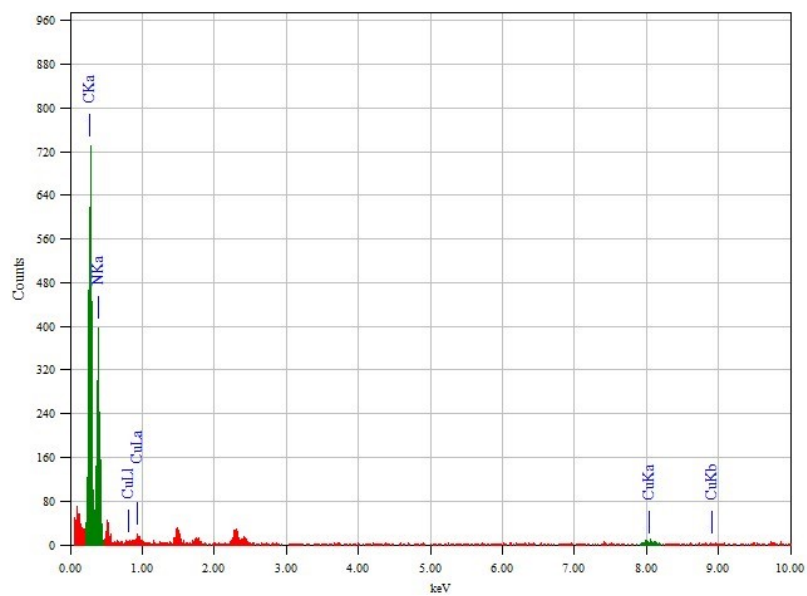

**Fig. S7.** The EDS spectrum recorded from the mapping region of  $\text{Cu}_1/\text{C}_3\text{N}_4$  in Fig. 1c.

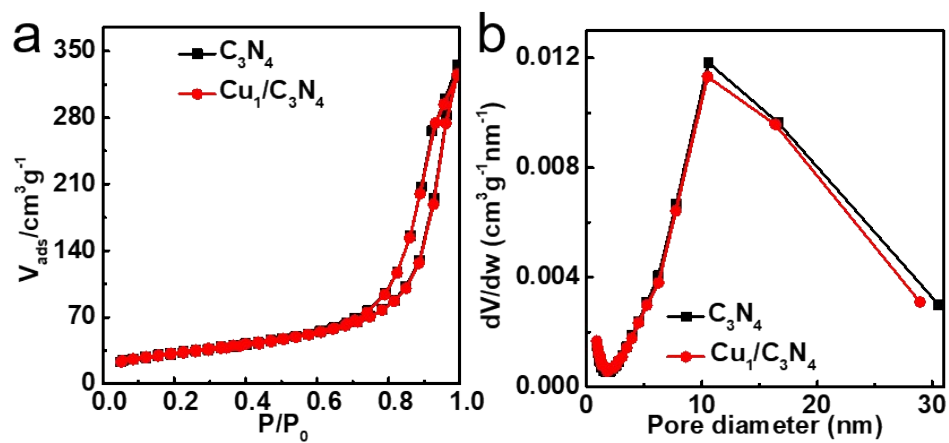

**Fig. S8** Adsorption-desorption isotherms (a) and the pore size distribution plots (b) of  $C_3N_4$  (black line) and  $Cu_1/C_3N_4$  (red line).

**Table S1.** BET surface areas and pore sizes of C<sub>3</sub>N<sub>4</sub> and Cu<sub>1</sub>/C<sub>3</sub>N<sub>4</sub>.

| Samples                                        | S <sub>BET</sub> (m <sup>2</sup> /g) | Pore size (nm) |
|------------------------------------------------|--------------------------------------|----------------|
| C <sub>3</sub> N <sub>4</sub>                  | 117.4283                             | 8.9535         |
| Cu <sub>1</sub> /C <sub>3</sub> N <sub>4</sub> | 117.3434                             | 8.6964         |

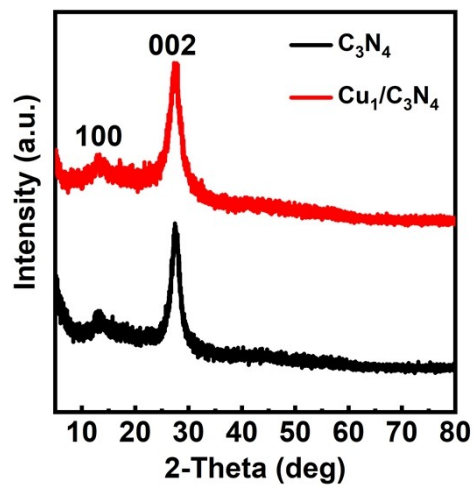

**Fig. S9** XRD patterns of  $\text{C}_3\text{N}_4$  (black line) and  $\text{Cu}_1/\text{C}_3\text{N}_4$  (red line).

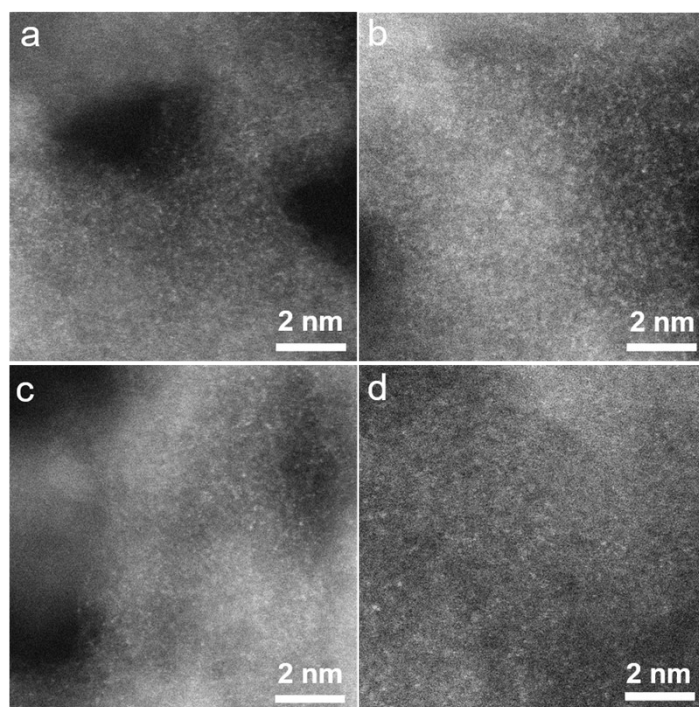

**Fig. S10** Representative AC HAADF-STEM images of Cu<sub>1</sub>/C<sub>3</sub>N<sub>4</sub> at different regions.

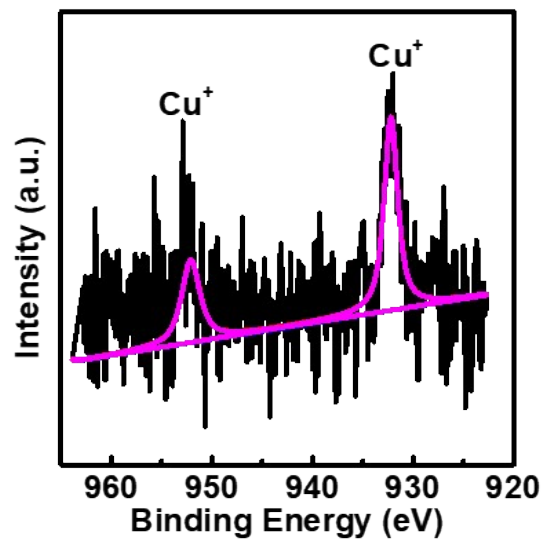

**Fig. S11** High resolution Cu 2p XPS spectrum of  $\text{Cu}_1/\text{C}_3\text{N}_4$ .

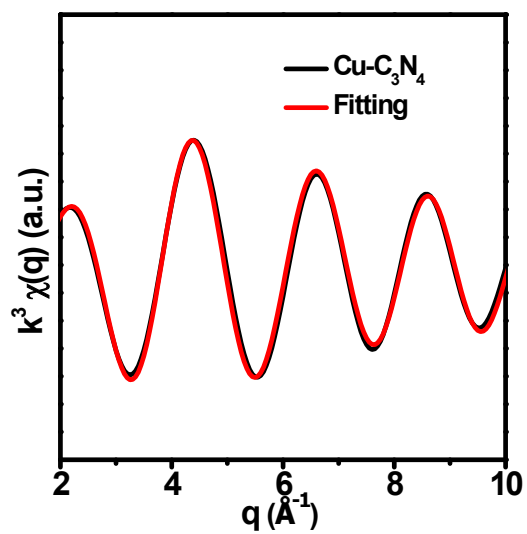

**Fig. S12** Corresponding fitting curves of EXAFS spectrum of Cu<sub>1</sub>/C<sub>3</sub>N<sub>4</sub> in  $q$  space.

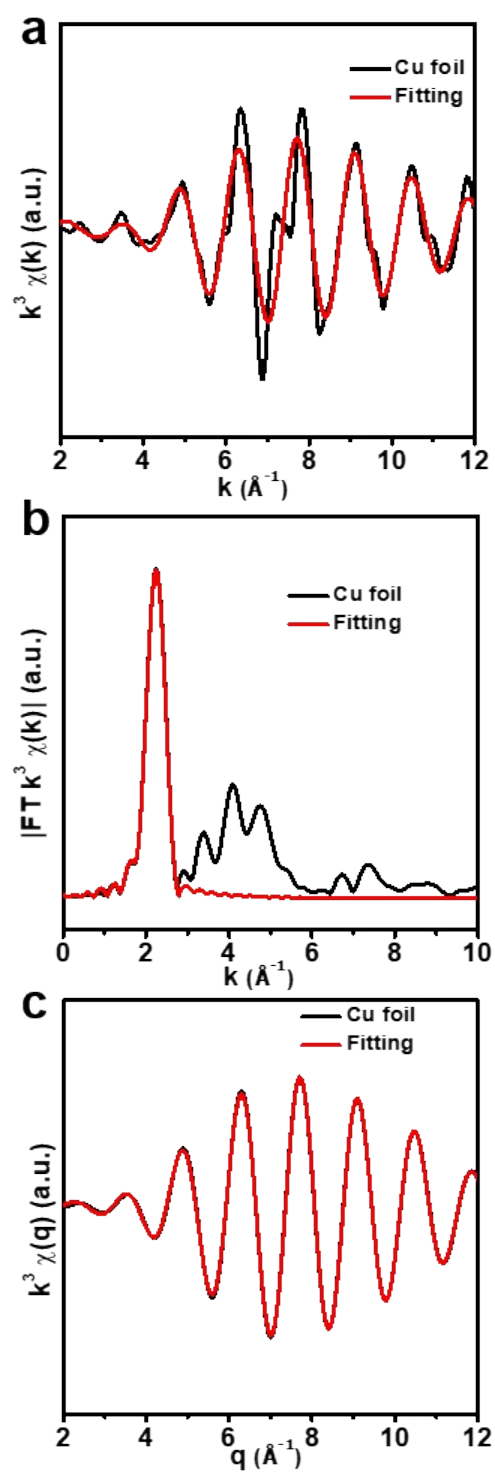

**Fig. S13** The corresponding Cu foil EXAFS fitting curves at R space (a), k space (b) and q space (c).

**Table S2.** Structural parameters extracted from the Cu K-edge EXAFS fitting. ( $S_0^2 = 0.81$ )

| Sample                                         | Scattering pair | CN  | R (Å) | $\sigma^2$ ( $10^{-3}\text{Å}^2$ ) | $\Delta E_0$ (eV) | R factor |
|------------------------------------------------|-----------------|-----|-------|------------------------------------|-------------------|----------|
| Cu <sub>1</sub> /C <sub>3</sub> N <sub>4</sub> | Cu-N/C          | 2.2 | 1.97  | 5.4                                | 1.5               | 0.005    |
| Cu foil                                        | Cu-Cu           | 12* | 2.54  | 4.0                                | 0.5               | 0.004    |

$S_0^2$  is the amplitude reduction factor; CN is the coordination number; R is interatomic distance (the bond length between central atoms and surrounding coordination atoms);  $\sigma^2$  is Debye-Waller factor (a measure of thermal and static disorder in absorber-scatterer distances);  $\Delta E_0$  is edge-energy shift (the difference between the zero kinetic energy value of the sample and that of the theoretical model). R factor is used to value the goodness of the fitting.

\* This value was fixed during EXAFS fitting, based on the known structure.

Error bounds that characterize the structural parameters obtained by EXAFS spectroscopy were estimated as  $N \pm 20\%$ ;  $R \pm 1\%$ ;  $\sigma^2 \pm 20\%$ ;  $\Delta E_0 \pm 20\%$ .

Cu<sub>1</sub>/C<sub>3</sub>N<sub>4</sub> (FT range: 2.0-12.0 Å<sup>-1</sup>; fitting range: 0.8-2.0 Å)

Cu foil (FT range: 2.0-12.0 Å<sup>-1</sup>; fitting range: 1.4-2.8 Å)

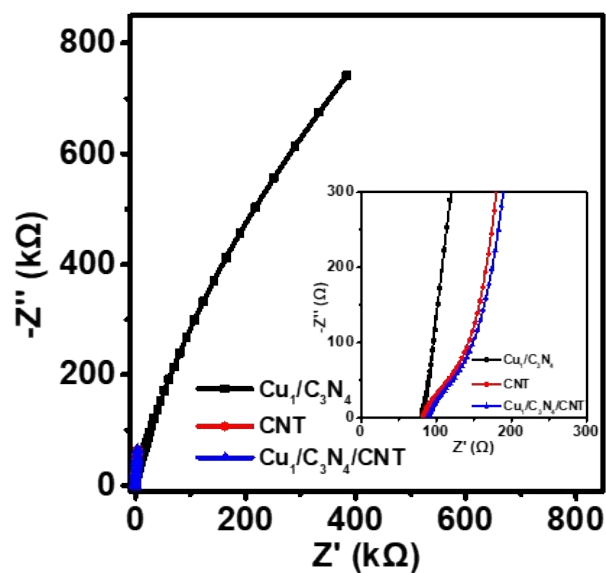

**Fig. S14** Nyquist plots of electrochemical impedance spectra for GC electrodes modified with  $Cu_1/C_3N_4$  (black line), CNT (red line), and  $Cu_1/C_3N_4/CNT$  (blue line) catalysts in aCSF under  $N_2$  atmosphere operated at open circuit potential with an amplitude of 10 mV and a frequency range of 0.1 Hz – 100 kHz. Inset: the enlarged Nyquist plots.

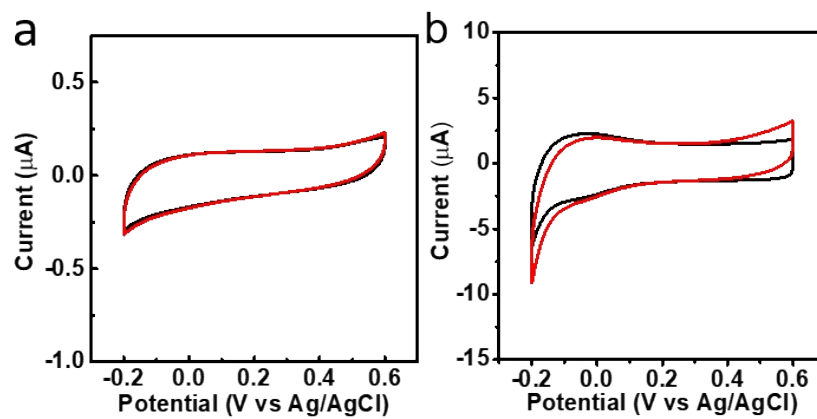

**Fig. S15** CVs of  $\text{C}_3\text{N}_4/\text{GC}$  (a) and  $\text{C}_3\text{N}_4/\text{CNT}/\text{GC}$  (b) in aCSF without (black line) and with (red line) 5 mM  $\text{H}_2\text{O}_2$ .

Scan rates: 50 mV/s.

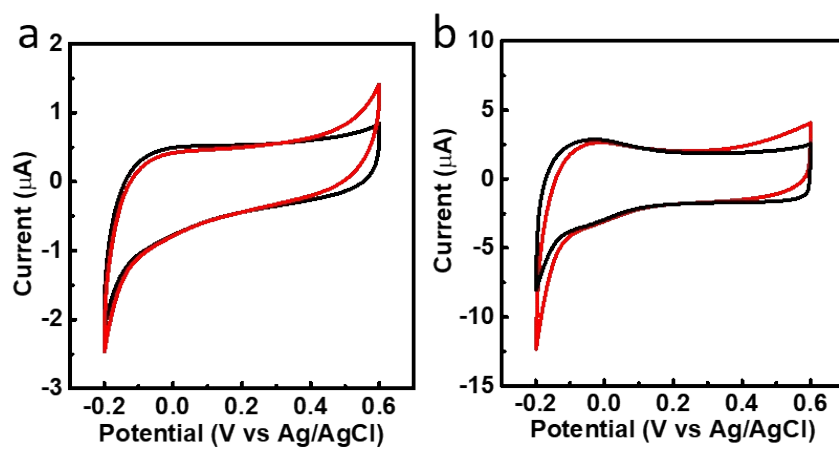

**Fig. S16** CVs of bare GC (a) and CNT/GC (b) in aCSF without (black line) and with (red line) 5 mM  $\text{H}_2\text{O}_2$ . Scan rates: 50 mV/s.

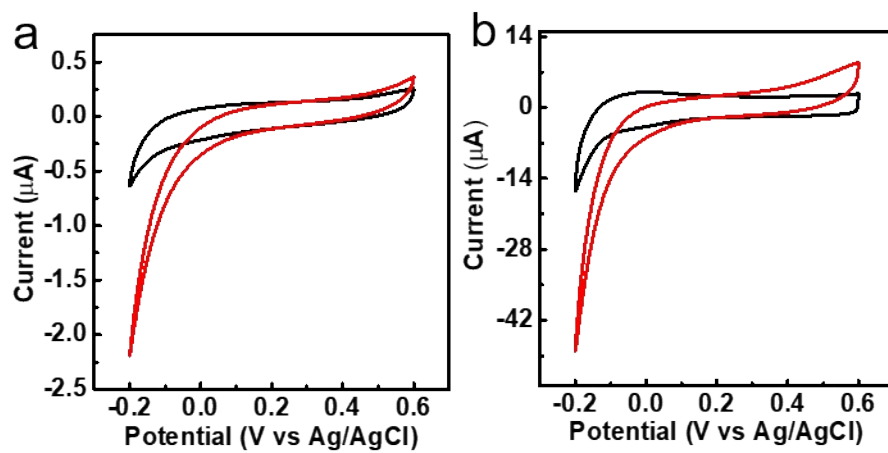

**Fig. S17** CVs of  $\text{Cu}_1/\text{C}_3\text{N}_4/\text{GC}$  (a) and  $\text{Cu}_1/\text{C}_3\text{N}_4/\text{CNT}/\text{GC}$  (b) in aCSF without (black line) and with (red line) 5 mM  $\text{H}_2\text{O}_2$ . Scan rates: 50 mV/s.

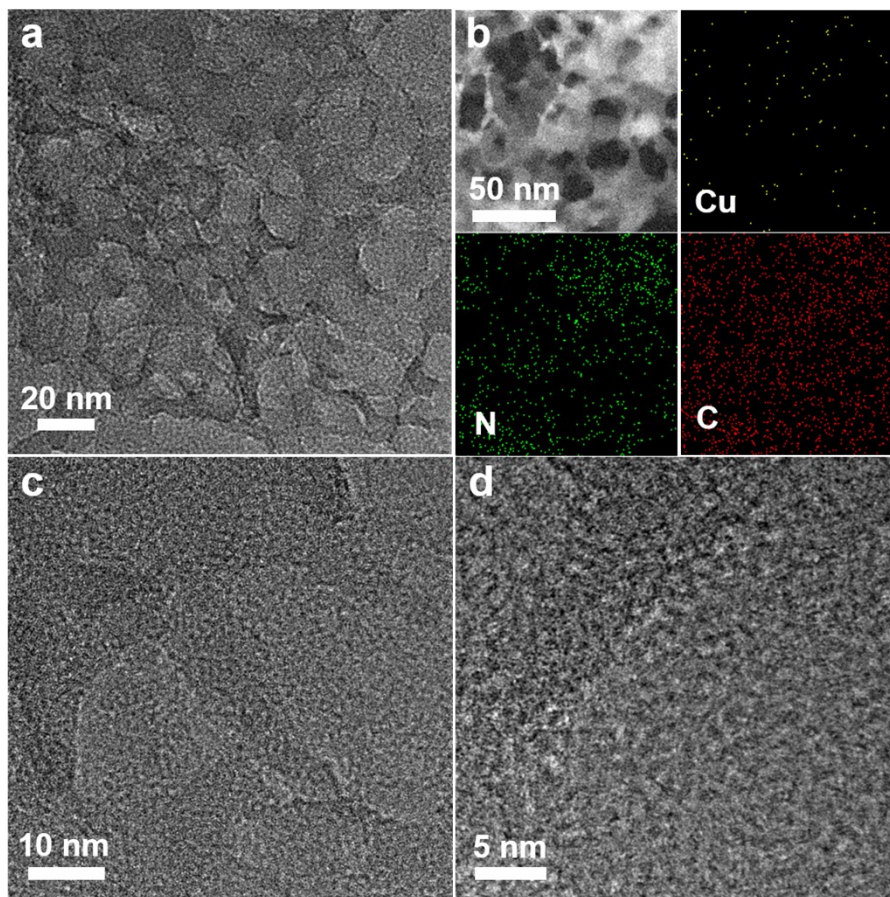

**Figure S18.** (a) TEM image of the  $\text{Cu}_1/\text{C}_3\text{N}_4$  catalyst after test. (b) HAADF-STEM and corresponding element mapping images of the  $\text{Cu}_1/\text{C}_3\text{N}_4$  catalyst after test showing the uniform distribution of Cu (yellow), N (green) and C (red). (c, d) High-resolution TEM images of the  $\text{Cu}_1/\text{C}_3\text{N}_4$  catalyst after test.

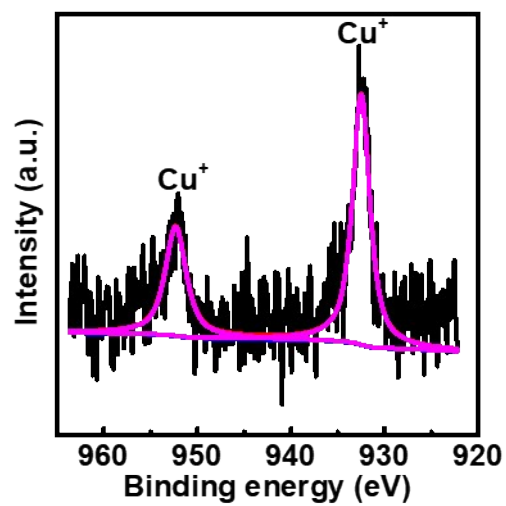

**Fig. S19** High resolution Cu 2p XPS spectrum of the used  $\text{Cu}_1/\text{C}_3\text{N}_4$ .

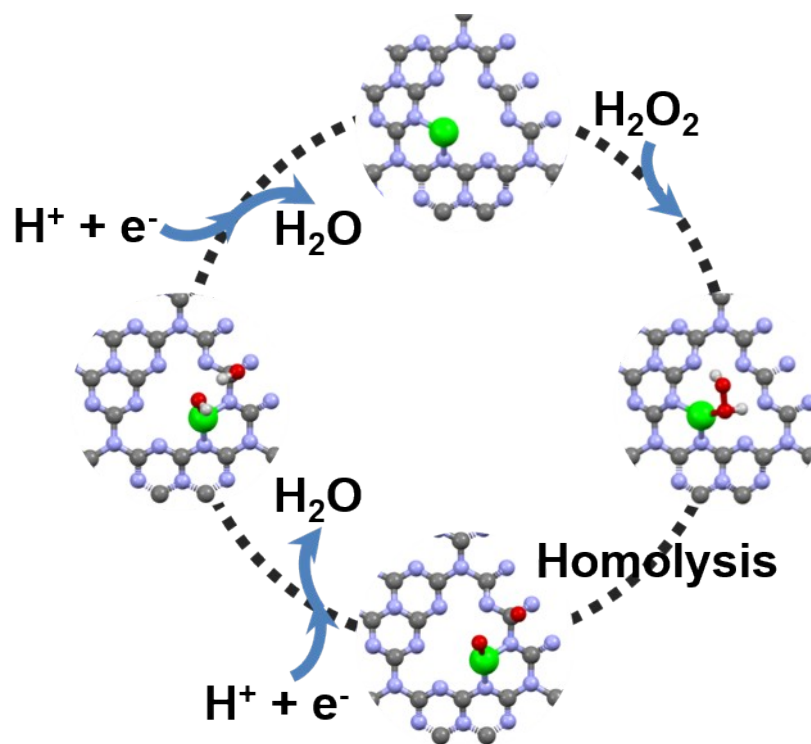

**Fig. S20** Top views of atomic configurations for intermediate states of  $\text{H}_2\text{O}_2$  reduction. Blue, black, green, red and grey spheres represent N, C, Cu, O and H atoms, respectively.

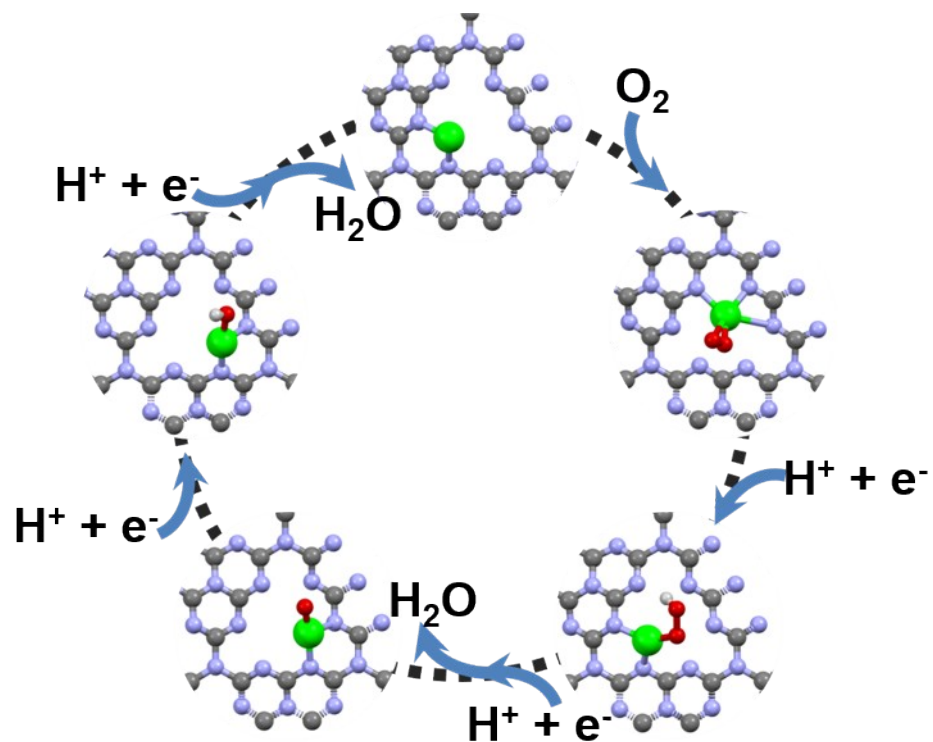

**Fig. S21** Top views of atomic configurations for intermediate states of  $\text{O}_2$  reduction. Blue, black, green, red and grey spheres represent N, C, Cu, O and H atoms, respectively.

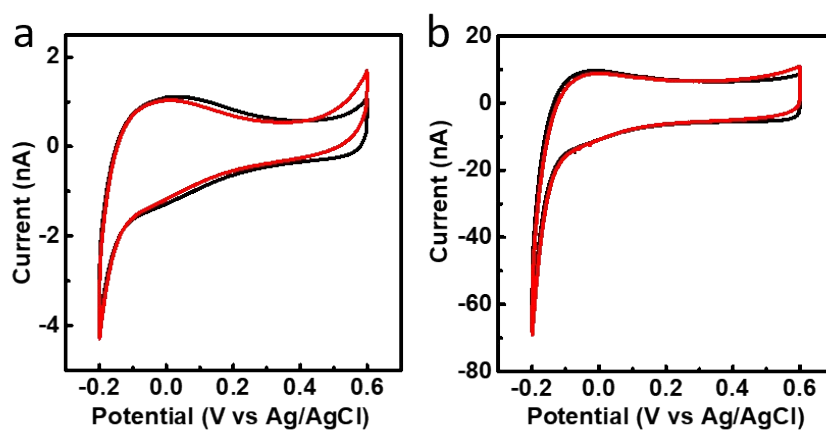

**Fig. S22** CVs obtained with bare CFE (a) and CNT/CFE (b) in aCSF in the absence (black line) and presence of 5 mM  $\text{H}_2\text{O}_2$  (red line). Scan rates: 50 mV/s.

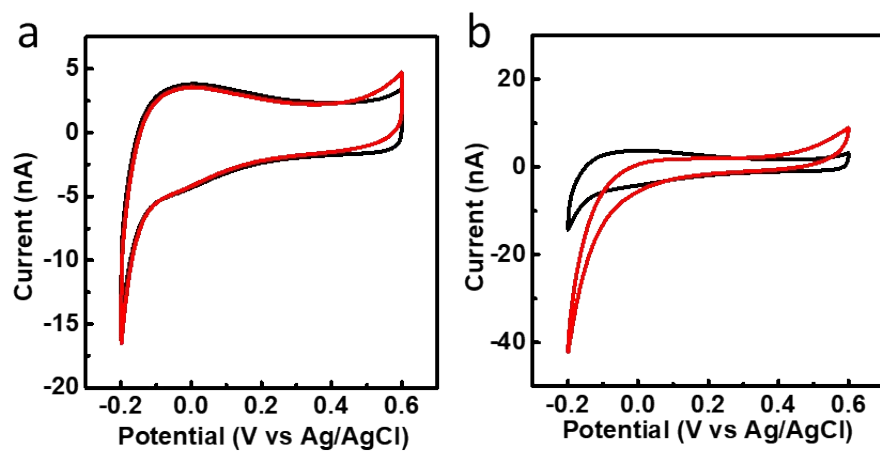

**Fig. S23** CVs obtained with  $\text{C}_3\text{N}_4/\text{CNT}/\text{CFE}$  (a) and  $\text{Cu}_1/\text{C}_3\text{N}_4/\text{CNT}/\text{CFE}$  (b) in aCSF in the absence (black line) and presence of 5 mM  $\text{H}_2\text{O}_2$  (red line). Scan rates: 50 mV/s.

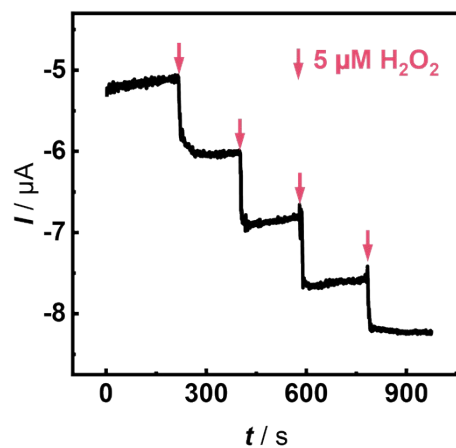

**Fig. S24** Amperometric response at the microsensor in aCSF toward successive addition of  $5 \mu\text{M H}_2\text{O}_2$ . Applied potential:  $0.0 \text{ V vs. Ag/AgCl}$ .

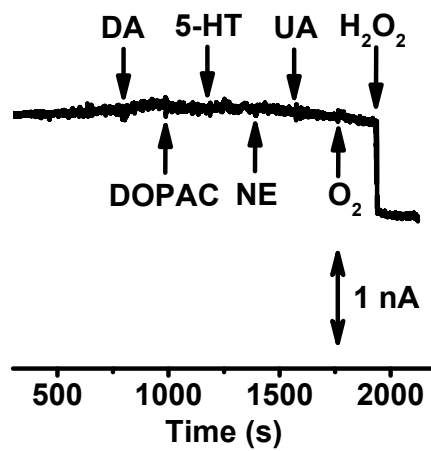

**Fig. S25** Amperometric response recorded with the microsensor in aCSF toward 10  $\mu$ M DA, 10  $\mu$ M DOPAC, 10  $\mu$ M 5-HT, 10  $\mu$ M NE, 10  $\mu$ M UA, 50  $\mu$ M O<sub>2</sub> and 5  $\mu$ M H<sub>2</sub>O<sub>2</sub>. Applied potential: 0.0 V vs. Ag/AgCl.

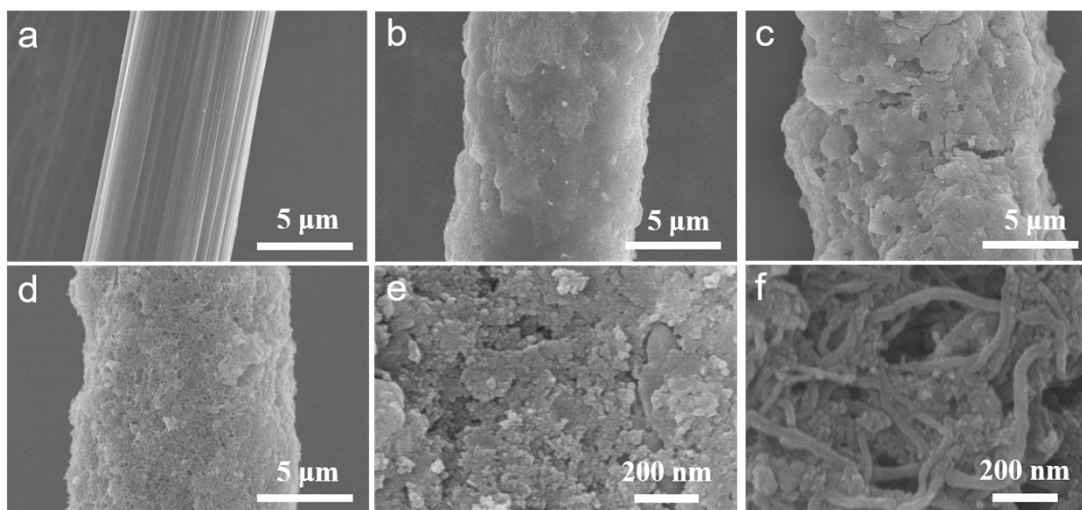

**Fig. S26** (a-d) SEM images of bare CFE (a),  $C_3N_4$ /CFE (b),  $Cu_1/C_3N_4$ /CFE (c) and  $Cu_1/C_3N_4/CNTs$ /CFE (d). (e-f) The magnified images of (c) and (d), respectively.

Compared to bare CFE with relatively smooth surface (Fig. S24a), the microsensor prepared with the nanocomposites of  $Cu_1/C_3N_4$  and CNTs displays a rough surface but with the uniform coating of the catalyst (Fig. S24b-f).

### 3. Supplementary Discussions of Calculations

All the calculations in this work were performed by spin-polarized DFT with a periodic surface model using CASTEP program implemented in the Materials Studio. The OTFG (on the fly generated) ultrasoft pseudopotentials and the Perdew-Burke-Ernzerhof exchange-correlation functional within the generalized gradient approximation were selected<sup>[3]</sup>. A cut-off energy of 500 eV was used for plane wave basis set, while further increasing the value causes little difference in the results (Figure S27). A Monkhorst-Pack k-point 0.03 Å<sup>-1</sup> spacing was utilized to integrate Brillouin zone. A quasi-Newton optimized BFGS (Broyden, Fletcher, Goldfarb, and Shanno) algorithm was used to optimize the adsorption geometries. The convergence criteria for the total energy, forces, stress, atomic displacement, and self-consistent field iterations were set to  $1 \times 10^{-5}$  eV atom<sup>-1</sup>,  $3 \times 10^{-2}$  eV Å<sup>-1</sup>,  $5 \times 10^{-2}$  GPa,  $1 \times 10^{-3}$  Å, and  $1 \times 10^{-6}$  eV atom<sup>-1</sup>, respectively.

The reaction energy ( $\Delta E$ ) of each elementary step was calculated using:

$$\Delta E = \sum E_{\text{products}} - \sum E_{\text{reactants}}$$

$\sum E_{\text{reactants}}$  and  $\sum E_{\text{products}}$  are the total energy of the reactants and product, respectively.

The ORR and HPRR reaction pathways were calculated on Cu<sub>1</sub>/mpg-C<sub>3</sub>N<sub>4</sub> model. The computational hydrogen electrode was utilized to obtain free energies for each state. In neutral condition, the 4e<sup>-</sup> ORR could go through a following pathway with several elementary steps:

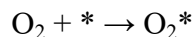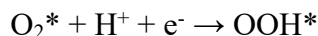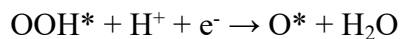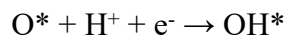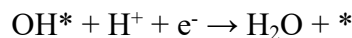

And the HPRR pathway consists of following steps:

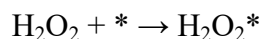

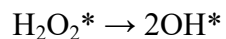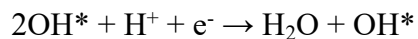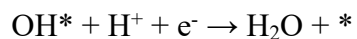

The chemical potential for ( $\text{H}^+ + \text{e}^-$ ) (i.e. the free energy of each H) is equal to that of  $1/2 \text{H}_2$  when setting the reference potential to be that of the standard hydrogen electrode at standard condition ( $T = 298 \text{ K}$ ,  $P_{\text{H}_2} = 1 \text{ bar}$ , and  $\text{pH} = 0$ ). The change of reaction free energy ( $\Delta G$ ) is further estimated by the function:

$$\Delta G = \Delta H - T\Delta S - qU + k_{\text{B}}T \ln 10 \times \text{pH}$$

$\Delta H$ : the reaction enthalpy of each elementary step and is obtained from the reaction energy ( $\Delta E$ ) by calculations using zero-point energy (ZPE) correction

$\Delta S$ : the change of entropy at temperature  $T$

$U$ : the applied potential

$q$ : the charge transferred in each elementary step

$k_{\text{B}}$ : the Boltzmann constant.

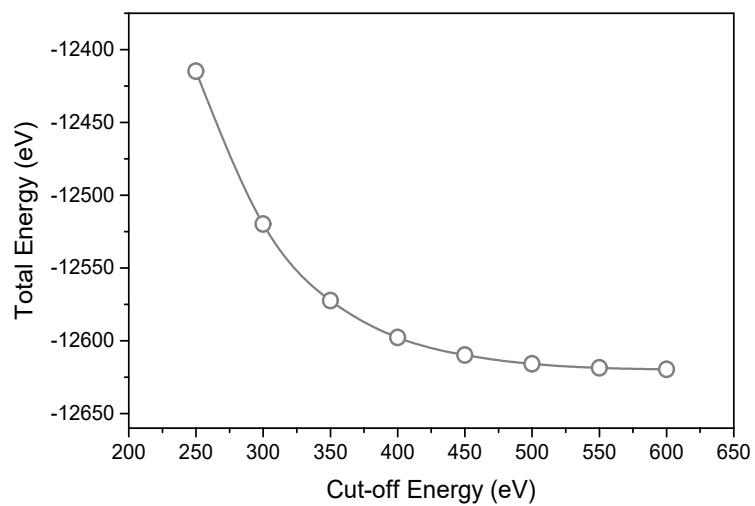

**Fig. S27** Total DFT energy varies with the cut-off energy for the periodic surface model used in this work.

**Table S3.** Calculated Gibbs free energies ( $\Delta G$ ) of elementary steps for  $\text{H}_2\text{O}_2$  reduction and  $\text{O}_2$  reduction on  $\text{Cu}_1/\text{C}_3\text{N}_4$  SAC.

| Elementary reactions                               |                                                                                       | $\Delta G$ (eV) |
|----------------------------------------------------|---------------------------------------------------------------------------------------|-----------------|
| <b><math>\text{H}_2\text{O}_2</math> reduction</b> | $\text{H}_2\text{O}_2 + * \rightarrow \text{H}_2\text{O}_2^*$                         | -2.326          |
|                                                    | $\text{H}_2\text{O}_2^* \rightarrow 2\text{OH}^*$                                     | -1.798          |
|                                                    | $2\text{OH}^* + \text{H}^+ + \text{e}^- \rightarrow \text{H}_2\text{O} + \text{OH}^*$ | -0.505          |
|                                                    | $\text{OH}^* + \text{H}^+ + \text{e}^- \rightarrow \text{H}_2\text{O} + *$            | 1.31            |
| <b><math>\text{O}_2</math> reduction</b>           | $\text{O}_2 + * \rightarrow \text{O}_2^*$                                             | -1.933          |
|                                                    | $\text{O}_2^* + \text{H}^+ + \text{e}^- \rightarrow \text{OOH}^*$                     | -0.862          |
|                                                    | $\text{OOH}^* + \text{H}^+ + \text{e}^- \rightarrow \text{O}^* + \text{H}_2\text{O}$  | -0.933          |
|                                                    | $\text{O}^* + \text{H}^+ + \text{e}^- \rightarrow \text{OH}^*$                        | -1.999          |
|                                                    | $\text{OH}^* + \text{H}^+ + \text{e}^- \rightarrow \text{H}_2\text{O} + *$            | 1.44            |

#### 4. References

- [1] A. Savateev, N. V. Tarakina, V. Strauss, T. Hussain, K. Brummelhuis, J. M. S. Vadillo, Y. Markushyna, S. Mazzanti, A. P. Tyutyunnik, R. Walczak, M. Oschatz, D. M. Guldi, A. Karton, M. Antonietti, *Angew. Chem. Int. Ed.* **2020**, *59*, 15061-15068.
- [2] F. Wu, C. Pan, C.-T. He, Y. Han, W. Ma, H. Wei, W. Ji, W. Chen, J. Mao, P. Yu, D. Wang, L. Mao, Y. Li, *J. Am. Chem. Soc.* **2020**, *142*, 16861-16867.
- [3] B. Hammer, L. B. Hansen, J. K. Nørskov, *Phys. Rev. B: Condens. Matter Mater. Phys.* **1999**, *59*, 7413–7421.
